# Supplementary material for: Combined Effects of Routine Blood Pressure Lowering and Intensive Glucose Control on Macrovascular and Microvascular Outcomes in Patients With Type 2 Diabetes: New results from the ADVANCE trial
Source: PubMed Central journal article supplement — Diabetes Care. 2009 Aug 3;32(11):2068–74. doi: 10.2337/dc09-0959 (PMC2768202; doi:10.2337/dc09-0959), 2009-08-03
Supplement: supp_dc09-0959_dc09-0959_Online_Appendix.pdf [file supp_dc09-0959_dc09-0959_Online_Appendix.pdf]

## ONLINE APPENDIX

### *Additional Authors-*

Alan Cass, M.D., Ph.D.,<sup>1</sup> Paul Glasziou, M.D., Ph.D.,<sup>2</sup> Stephen Harrap, M.D., Ph.D.,<sup>3</sup> Liu Lisheng, M.D.,<sup>4</sup> Guiseppe Mancina, M.D., Ph.D.,<sup>5</sup> Avinesh Pillai, Ph.D.,<sup>1</sup> Neil Poulter, M.D.,<sup>6</sup> Vlado Perkovic, M.D., Ph.D.,<sup>1</sup> Florence Travert, M.D.,<sup>7</sup> on behalf of the ADVANCE Collaborative Group.

<sup>1</sup>The George Institute For International Health, University of Sydney, Sydney, Australia; <sup>2</sup>University of Oxford, Oxford, United Kingdom, and University of Queensland, Brisbane, Australia; <sup>3</sup>University of Melbourne and Royal Melbourne Hospital, Melbourne, Australia; <sup>4</sup>Chinese Hypertension League Institute, Beijing, China; <sup>5</sup>University of Milan-Biocca and San Gerardo Hospital, Milan, Italy; <sup>6</sup>Imperial College and St Mary's Hospital, London, United Kingdom; <sup>7</sup>Hôpital Bichat-Claude Bernard and Université Paris 7, Paris, France.

### *Conflicts of interest-*

Prof Cass, reports receiving lecture fees from Servier; Prof Harrap, receiving lecture fees from Servier, Prof Mancina, receiving consulting and lecture fees Servier, Novartis, Bayer, Boehringer Ingelheim, Merck and Sanofi-Aventis; Prof Poulter, receiving consulting or lecture fees from Gilstead, Bristol-Myers-Squibb, Sanofi-Aventis, Daiichi, Merck, Preventicum, Pfizer and Novartis, and grant support from Servier, Pfizer, Mars and Menarini; Dr Perkovic, receiving lecture fees from Servier; Dr Travert, receiving lecture fees from Servier.

**Supplementary Table - Concomitant therapy at baseline and end of 4.3 years follow up**

|                                                      | Registration visit                 |                                   |                                    |                                   | End of follow-up                   |                                   |                                    |                                   |
|------------------------------------------------------|------------------------------------|-----------------------------------|------------------------------------|-----------------------------------|------------------------------------|-----------------------------------|------------------------------------|-----------------------------------|
|                                                      | Intensive +<br>Per-ind<br>(n=2783) | Standard +<br>Per-ind<br>(n=2788) | Intensive +<br>Placebo<br>(n=2786) | Standard +<br>Placebo<br>(n=2783) | Intensive +<br>Per-ind<br>(n=2480) | Standard +<br>Per-ind<br>(n=2428) | Intensive +<br>Placebo<br>(n=2443) | Standard +<br>Placebo<br>(n=2420) |
| <b>Glucose Lowering Treatment</b>                    |                                    |                                   |                                    |                                   |                                    |                                   |                                    |                                   |
| Gliclazide modified-release, n (%)                   | 207 (7.4)                          | 226 (8.1)                         | 215 (7.7)                          | 217 (7.8)                         | 2177 (89.5)                        | 51 (2.2)                          | 2141 (89.8)                        | 48 (2.1)                          |
| Other sulfonylurea, n (%)                            | 1799 (64.6)                        | 1771 (63.6)                       | 1779 (63.8)                        | 1741 (62.6)                       | 69 (2.8)                           | 1398 (59.4)                       | 69 (2.9)                           | 1422 (60.7)                       |
| Metformin, n (%)                                     | 1704 (61.2)                        | 1695 (60.8)                       | 1692 (60.7)                        | 1660 (59.6)                       | 1781 (73.2)                        | 1540 (65.4)                       | 1787 (75.0)                        | 1603 (68.5)                       |
| Thiazolidinediones, n (%)                            | 95 (3.4)                           | 109 (3.9)                         | 106 (3.8)                          | 97 (3.5)                          | 442 (18.2)                         | 269 (11.4)                        | 423 (17.7)                         | 286 (12.2)                        |
| Acarbose, n (%)                                      | 243 (8.7)                          | 224 (8.0)                         | 269 (9.6)                          | 224 (8.0)                         | 448 (18.4)                         | 284 (12.1)                        | 481 (20.2)                         | 268 (11.4)                        |
| Glinides, n (%)                                      | 56 (2.0)                           | 40 (1.4)                          | 47 (1.7)                           | 44 (1.6)                          | 39 (1.6)                           | 71 (3.0)                          | 45 (1.9)                           | 77 (3.3)                          |
| Any oral hypoglycemic drug, n (%)                    | 2543 (91.4)                        | 2539 (91.1)                       | 2541 (91.1)                        | 2506 (90)                         | 2358 (97.0)                        | 2080 (88.4)                       | 2314 (97.1)                        | 2108 (90.0)                       |
| Insulin, n (%)                                       | 44 (1.6)                           | 36 (1.3)                          | 38 (1.4)                           | 41 (1.5)                          | 1005 (41.3)                        | 576 (24.5)                        | 927 (38.9)                         | 504 (21.5)                        |
| <b>Blood Pressure Lowering Treatment</b>             |                                    |                                   |                                    |                                   |                                    |                                   |                                    |                                   |
| Perindopril (open label), n (%)                      | 238 (8.6)                          | 252 (9.0)                         | 211 (7.6)                          | 238 (8.6)                         | 1107 (45.6)                        | 1021 (43.4)                       | 1348 (56.6)                        | 1243 (53.2)                       |
| Other angiotensin-converting enzyme inhibitor, n (%) | 974 (35.0)                         | 940 (33.7)                        | 992 (35.6)                         | 977 (35.1)                        | 94 (3.9)                           | 138 (5.9)                         | 94 (3.9)                           | 119 (5.1)                         |
| Angiotensin receptor blocker, n (%)                  | 143 (5.1)                          | 146 (5.2)                         | 166 (6.0)                          | 154 (5.5)                         | 229 (9.4)                          | 224 (9.5)                         | 296 (12.4)                         | 322 (13.8)                        |
| β-blockers, n (%)                                    | 661 (23.8)                         | 683 (24.5)                        | 691 (24.8)                         | 694 (24.9)                        | 760 (31.3)                         | 732 (31.1)                        | 846 (35.5)                         | 825 (35.3)                        |
| Calcium antagonists, n (%)                           | 837 (30.1)                         | 832 (29.9)                        | 865 (31.0)                         | 893 (32.1)                        | 763 (31.4)                         | 768 (32.6)                        | 1018 (42.8)                        | 1022 (43.7)                       |
| Thiazides, n (%)                                     | 396 (14.2)                         | 390 (14.0)                        | 407 (14.6)                         | 401 (14.4)                        | 80 (3.3)                           | 78 (3.3)                          | 100 (4.2)                          | 117 (5.0)                         |
| Other diuretics, n (%)                               | 313 (11.2)                         | 283 (10.2)                        | 289 (10.4)                         | 288 (10.4)                        | 345 (14.2)                         | 328 (13.9)                        | 387 (16.3)                         | 362 (15.5)                        |
| Other blood pressure lowering drugs, n (%)           | 356 (12.8)                         | 344 (12.3)                        | 322 (11.5)                         | 361 (13.0)                        | 252 (10.4)                         | 211 (9.0)                         | 309 (13)                           | 329 (14.1)                        |
| Any blood pressure lowering drug, n (%)              | 2089 (75.1)                        | 2077 (74.6)                       | 2095 (75.1)                        | 2105 (75.6)                       | 1828 (75.2)                        | 1806 (76.8)                       | 2014 (84.6)                        | 2010 (85.9)                       |
| <b>Other Drugs</b>                                   |                                    |                                   |                                    |                                   |                                    |                                   |                                    |                                   |
| Aspirin, n (%)                                       | 1210 (43.5)                        | 1235 (44.3)                       | 1249 (44.8)                        | 1200 (43.1)                       | 1380 (56.8)                        | 1300 (55.2)                       | 1309 (55)                          | 1265 (54.1)                       |
| Other antiplatelets, n (%)                           | 126 (4.5)                          | 110 (3.9)                         | 145 (5.2)                          | 124 (4.5)                         | 160 (6.6)                          | 132 (5.6)                         | 142 (6.0)                          | 127 (5.4)                         |
| Statins, n (%)                                       | 756 (27.2)                         | 782 (28.1)                        | 798 (28.6)                         | 810 (29.1)                        | 1067 (43.9)                        | 1059 (45.0)                       | 1053 (44.2)                        | 1079 (46.2)                       |
| Other lipid modifying drugs, n (%)                   | 261 (9.4)                          | 211 (7.6)                         | 240 (8.6)                          | 224 (8.0)                         | 198 (8.1)                          | 196 (8.3)                         | 153 (6.4)                          | 156 (6.7)                         |
